# Supplementary material for: Effect of Flash Glucose Monitoring in T1DM Patients with Multiple Daily Insulin Injections:Improved HbA1C and Reduced Glycemic Variability
Source: Research Square preprint supplement (doi:10.21203/rs.3.rs-657144/v1), 2021-06-30
Supplement: Supplementary file 1 [file 5de8c963ddfe3fb69b00361d.xlsx]

## Sheet: BOOK2
第1周	IQR	TIR	HbA1C	MBG	低血糖时间	24周	IQR	TIR	HbA1C	MBG	低血糖时间	48周	IQR	TIR	HbA1C	MBG	低血糖时间
FGM	11.5	23	9.5	12.4	259		8.6	58	7.8	10	187		7.5	64	7.1	8.8	173
	13.2	14	10	13	288		10.5	24	9.5	12.5	245		8.8	40	8.6	11.3	216
	9.8	31	9.2	11.8	216		7.3	41	8.6	11.2	202		4.9	63	7.2	9	187
	10.3	21	9.6	12.6	288		11.2	15	9.9	13.1	274		7.9	52	7.3	8.8	202
	10.8	14	11	14.8	216		8.9	28	9.2	12.2	187		8.5	35	8.9	11.5	187
	6.7	45	8.5	11.2	187		5.6	55	8.1	10.4	158		4.4	66	7.4	9.2	144
	7.2	37	8.8	11.6	173		3.6	70	7	8.5	130		3.8	62	7.3	8.9	144
	15.6	9	13.1	18.3	187		12.4	13	10.2	13.8	202		9.8	41	8.3	10.7	173
	6.2	49	8.1	10.4	230		4.7	67	7.4	9	173		5.1	55	7.9	10	158
	5.8	56	7.7	9.5	158		5.1	52	7.8	10.1	144		4.6	69	7.1	8.7	144
	6.4	53	7.9	10	173		4.6	74	6.5	8.1	144		3.9	78	6.8	8.4	158
	11.9	11	12.9	11.3	158		13.3	9	11.3	15.2	173		9.5	29	9.4	12.3	173
	4.2	61	7.5	8.8	115		6.5	49	8.2	10.1	86		4.5	60	7.5	9.4	72
	3.8	72	7.1	8.7	144		3.5	75	6.6	8.3	130		3.1	78	5.8	6.4	130
	6.5	48	8.2	10.5	202		5.6	57	7.9	10.5	187		5.2	61	7.6	9.6	158
	6.7	41	8.6	11.4	187		4.1	61	7.8	9.6	158		3.3	65	7.3	9.1	144
	8.6	33	9	12	216		8	37	8.7	11.2	202		7.5	56	6.8	8.3	187
	5.5	56	7.8	9.8	230		5.2	64	7.5	9.4	202		5.7	70	7.2	8.9	173
	7.1	44	8.4	10.9	173		6.7	41	8.5	11.3	187		3.6	75	6.9	8.5	130
	3.7	70	7	8.5	173		4.3	55	7.7	9.8	158		4.4	66	7.3	9	158
	5.1	63	7.3	8.8	187		3.9	78	6.5	7.9	130		3.5	74	5.8	6.5	115
	7.5	41	8.4	10.6	158		2.8	80	6.7	7.8	115		3.2	73	7.6	9.5	115
	9	32	9	11.9	245		9.1	40	8.5	10.8	216		7.7	52	7.9	9.8	230
	9.6	25	9.5	12.8	216		8.2	48	8.2	10.6	187		6.2	63	7.4	9.1	202
	7.1	37	8.8	11.4	158		6.4	47	8.4	11	173		5.8	52	8.1	10.4	158
	8.3	32	9.1	12.1	202		6.2	51	8.2	10.7	173		5.3	59	7.7	9.9	173
	9.4	24	7.1	8.7	144		5.9	59	7.5	9.5	158		4.2	73	6.8	8.2	130
	5.5	64	6.8	8.2	158		5.1	63	7.4	9.9	101		4.5	75	7	8.6	115
	7.3	44	8.2	10.5	230		6.6	50	8.2	10.2	245		4.7	69	7.1	8.7	187
	5.6	57	7.3	9.1	202		6.3	52	7.8	9.8	173		3.7	71	6.8	8.4	158
	4.9	61	7.7	9.9	187		3.7	77	6.5	7.5	144		2.9	80	6.9	8.2	72
	6.9	49	8.5	10.8	144		4.8	65	7.4	9.6	115		3.3	73	6.2	7.1	101
	8.7	31	9.2	12.2	274		6.5	49	8.3	10.9	245		6.2	64	7.1	8.7	187
	11.6	19	11.6	15.4	259		10.8	17	10.3	13.6	216		8.8	36	8.6	11.4	202
	12	16	10.3	14.4	216		9.6	45	8.2	10.5	173		7.5	62	7.5	9.8	158
	8.7	38	9.2	12.5	230		9.3	42	8.4	10.9	202		9.5	49	8.2	10.7	216
	6.5	41	8.5	11.1	173		6.2	47	8.1	10.4	187		4.9	68	7.2	8.8	144
	10.5	21	9.9	13	158		8.7	33	9.2	12.2	115		9.6	29	9.5	12.6	115
	6.1	58	7.1	8.9	130		4.4	75	6.5	8	86		3.6	76	6.9	8.4	101
	9.4	27	9.4	12.5	144		8.2	39	8.5	11.3	144		6.8	58	7.1	8.8	130
	11.2	19	10.2	13.7	173		9.9	31	9.1	12.1	158		7.4	56	7.8	9.7	144
	9.5	34	8.9	11.6	187		5.5	73	6.7	8.2	115		3.2	82	6.5	7.8	130
	4.3	67	7.2	8.9	130		4.7	70	7.1	8.8	101		4.2	65	7.4	9.3	115
	6.8	41	8.5	10.8	202		5.6	52	8.2	10.5	173		4.3	74	6.9	8.5	187
	11.3	20	9.7	12.9	216		6.1	48	8.4	10.7	202		5.5	60	7.3	9	158
	6.3	39	8.6	11.4	115		4.3	61	7.7	9.9	130		4.5	68	7.1	9.2	130
	5.9	57	7.5	9.4	158		6.2	65	7.3	9.1	144		5.4	58	7.6	9.7	144
	11.1	18	11.5	15.5	187		8.8	32	9.2	12.4	158		4.6	71	7.5	9.4	130
	12.3	17	10.2	14.5	245		9.4	35	8.9	11.5	259		7.2	52	7.7	9.5	216
	11.4	23	10.8	15.1	274		9.2	28	9.5	12	274		8.5	56	7.8	10.1	230
	6.2	56	7.8	9.9	259		6.4	62	7.2	8.8	216		6.1	67	7.2	8.6	187
	7.1	38	8.9	11.6	202		5.4	60	7.6	9.5	187		4.4	77	6.1	6.8	158
	9.5	28	9.4	12.4	230		4.4	75	6.3	7.2	173		3.4	74	7.2	9.1	158
	10.9	21	10.7	14.8	274		7.9	37	8.8	11.4	230		5.8	63	7.1	8.6	202
	11.9	15	9.9	13.3	259		8.5	44	8.5	10.6	202		6.3	72	6.8	8.2	187
	9.5	26	11.7	16	302		8.6	34	8.9	11.3	259		5.5	65	7.2	8.8	230
	12.4	14	10.3	13.7	173		9.7	35	9.5	12.5	187		9.5	44	8.6	11.5	173
	5.3	62	7.5	9.6	158		4.7	58	7.7	9.8	158		3.3	73	6.9	8.5	130
	6.2	46	8.4	10.7	245		3.5	77	6.5	7.8	202		2.8	75	7	8.8	187
	10.8	18	9.8	13.2	230		7.2	48	8.3	11	187		5.1	64	7.4	9.3	187
	7	39	8.6	11.5	216		5.3	51	8.1	10.8	202		6.5	58	7.7	9.9	158
	11.5	12	10.3	13.6	259		9.6	27	9.4	12.4	230		8.9	55	7.6	9.6	202
	10.8	27	10.7	14.7	187		8.6	39	8.7	11.5	144		7.7	52	7.9	10	144
	10.3	21	9.6	12.8	187		8.8	42	8.3	10.2	158		8.4	55	8.1	10.4	173
	6.6	42	8.6	11.3	173		4.9	66	7.5	9.1	130		3.9	76	6.8	8.4	115
	9.4	20	9.7	12.7	230		8.8	18	9.5	12.9	187		7.5	53	7.4	9.2	144
	6.7	47	7.3	9	216		5.5	60	7.5	9.6	173		5	64	7.8	9.7	158
	3.4	79	7	8.3	202		3.8	63	7.4	9.7	144		3.1	74	7	8.5	130
	7.4	37	8.8	11.4	230		5.7	55	7.9	10	202		3.6	81	6.4	7.7	158
	8.5	31	10.4	14	173		6.6	33	9.2	12.5	158		6.9	46	8.5	10.9	130
	12.8	9	11.6	16.5	259		10.2	26	9.7	12.9	216		8.3	56	7.3	9.1	158
SMBG	12.5	16	10.3	13.8	245		11.8	15	10.1	13.2	202		10.7	18	9.8	13.1	216
	13.8	11	11.2	15.3	216		13.6	8	11.4	15.1	230		12.7	15	10.7	14.3	245
	8.2	38	8.5	10.6	173		8.5	43	8.8	11.2	187		9.2	48	8.2	10.7	187
	4.9	65	7.4	9.2	187		6.4	51	8.2	10.8	158		5.9	50	8.1	10.3	202
	10.6	24	9.6	12.9	202		9.9	28	9.3	12.4	202		7.1	42	8.5	11.2	187
	10.3	20	10.6	13.2	187		9.2	26	10	13.4	158		8.7	32	9.5	12.8	202
	6.2	39	8.9	11.5	216		5.6	45	8.5	11	202		5.3	47	8.3	10.9	187
	8.8	31	9.1	12	187		6.9	40	8.6	11.3	158		6.5	49	8	10	158
	7.4	36	8.8	11.5	187		7.2	31	9.3	12.1	187		7.7	38	8.5	10.8	173
	5.1	62	7.5	9.4	158		5.2	65	7.4	9.3	144		4.8	55	7.9	10.1	173
	9.8	19	10.2	13.9	173		8.2	24	9.5	12.6	187		7.5	31	9.1	11.9	202
	7.1	39	8.7	11.1	202		7.5	42	8.8	11.5	202		6.6	48	8.2	10.5	216
	6.8	59	7.1	8.9	130		5.9	64	7.5	9.5	115		6.3	53	8.1	10.6	187
	3.7	81	7	7.6	144		3.5	73	7	8.5	130		2.8	87	6.2	7.4	158
	9.1	28	9.4	12.1	173		8.3	33	9	11.5	158		7.8	31	9.1	11.8	187
	6.1	58	7.8	9.9	158		5.5	62	7.5	9.4	187		4.5	72	6.9	8.5	158
	11.1	20	10.7	14.5	230		9.5	33	9.1	12	216		8.8	46	8.2	10.4	216
	9.4	29	9.5	12.8	216		8.7	39	8.8	11.4	187		8.1	45	8.4	10.8	245
	8.5	16	10.3	13.7	259		7.9	18	9.9	13.1	274		9	11	10.2	13.7	245
	5.8	59	7.8	9.6	173		5.5	61	7.7	9.9	158		4.7	66	7.3	9.2	216
	4	75	7.1	7.7	115		4.7	66	7.5	9.4	101		3.8	69	7.2	9.2	130
	8.2	33	9.2	12.2	158		6.8	45	8.5	11.8	158		6.2	56	7.8	9.9	144
	5.4	59	7.8	9.5	144		5.6	54	7.9	10	130		4.9	65	7.3	9.2	130
	9.3	28	8.4	10.6	187		6.5	52	7.6	9.7	173		7.4	37	8.1	10.5	202
	10.1	22	9.5	12.5	202		8.7	45	8.4	10.3	187		6.6	60	7.5	9.5	173
	6.8	45	7.3	9.1	173		6.3	62	6.5	7.7	144		6.1	57	7.3	9	158
	7.8	37	8.9	11.5	216		6.2	56	7.8	9.8	202		5.8	54	7.7	10.4	202
	8.8	31	9.4	12.5	216		8.4	36	8.9	11.6	230		7.7	41	8.5	11.3	187
	7.5	42	8.5	11	202		5.4	67	7.1	8.8	187		3.5	80	6.6	7.8	202
	6.4	50	8.3	10.4	158		5.9	59	7.7	9.4	144		5.8	55	7.9	9.5	158
	9.9	17	9.9	13.3	245		7.6	26	9.5	12.5	216		6.9	36	8.8	11.4	230
	10.4	22	11.5	16.2	274		9.3	24	10.2	13.7	245		8.8	33	9.4	12.5	259
	7.2	46	8.6	10.8	173		6.5	51	8.1	10.2	173		6.4	56	7.8	9.7	158
	7.7	40	9.2	12.3	230		7.2	45	8.6	11.2	216		8.2	37	9.1	12.2	216
	8.6	26	10.3	13.8	230		9	23	9.8	13	202		9.2	20	9.5	12.6	216
	7.3	39	8.7	11.4	216		7.5	40	8.6	11.5	187		6.3	52	7.9	9.7	173
	6.8	52	8.1	10.5	202		6.1	57	7.5	9.1	187		4.3	75	6.7	8.1	216
	7.3	48	8.5	11.1	230		6.9	52	8.2	10.6	230		5.4	63	7.2	9.1	202
	8.7	33	9.4	12.3	216		8.4	28	9.5	12.7	216		5.9	40	8.6	11.4	158
	4.7	66	7.2	9	187		4.4	72	7	8.3	158		3.6	78	6.5	7.8	144
	5.6	71	7.2	8.8	173		5.8	75	7.1	8.5	187		5.4	68	7.5	9	173
	5.2	61	7.5	9.5	158		4.9	60	7.9	10.1	144		4.6	65	7.3	9.2	144
	8.1	42	8.1	9.6	144		8.7	48	8.5	10.3	173		7.7	55	7.9	9.7	158
	8.8	42	9.9	13.5	202		8.3	45	9.4	12.3	202		9.1	39	9.2	12.5	216
	10.5	25	10.2	14.1	245		8.6	42	8.5	10.9	230		8.3	47	8.8	11.8	216
	6.8	45	8.6	11.2	230		6.2	58	7.7	9.5	202		4.2	75	6.8	7.9	173
	6.6	49	8.3	10.9	173		4.8	64	7.8	9.8	158		4.1	69	7.5	9.3	173
	11	15	10.4	14	187		9.2	27	9.5	11.5	187		9.7	29	9.2	12.6	173
	10.2	27	9.6	12.8	216		9.7	31	9.1	11.7	230		9.3	36	8.8	11.5	202
	7.7	53	7.6	9.3	158		6.5	64	7.1	8.8	158		5.5	67	7.5	9.4	187
	9.3	33	9.2	12.5	230		8.8	35	9	11.8	230		7.7	43	8.5	11.1	216
	7.5	36	9	11.9	230		7.1	44	8.6	10.9	216		7.8	41	8.8	11	202
	6.3	53	8.5	10.7	187		6.6	58	7.9	10	187		6.8	57	7.7	9.8	202
	8.1	41	9.2	12.1	216		7.4	45	8.7	11.4	230		7.2	48	8.4	10.6	216
	6.6	56	7.8	9.9	202		6.8	53	7.7	9.7	202		7.1	51	8.1	10.4	187
	9.7	22	10.2	13.6	230		8.5	28	9.3	12.3	202		8.3	24	9.6	12.8	216
	8.2	31	9.3	12.4	245		8.7	36	8.9	11.6	230		7.6	44	8.5	11.9	202
	11.5	16	11.1	15	202		10.4	20	9.9	13.3	216		9.6	27	9.4	12.2	187
	6.9	52	8.4	10.7	173		7.2	47	8.5	11.2	173		6.2	55	7.8	9.7	202
	9	37	9.5	12.5	158		7.6	50	8.5	11.6	144		8.4	42	8.8	11.4	173
	8.8	40	8.6	11.4	173		8.2	46	8.2	10.8	187		7.5	48	8.1	10.5	158
	9.4	38	9.7	12.9	202		10.3	26	9.3	12.4	230		10.2	21	9.5	12.6	230
	5.8	37	8.7	11.6	259		5.9	42	8.9	11	288		6.5	51	8	9.6	245
	8.7	36	9.1	12.1	245		8	33	9	12.5	230		8.4	38	8.6	11.1	216
	8.4	25	9.5	11.2	187		7.6	31	9.2	10.9	158		7.5	35	8.8	11.4	202
	6.7	56	8	10	173		6.9	43	8.5	11.4	187		6.4	58	7.6	9.8	173
	8.9	28	9.7	13.2	216		9.5	26	9.5	12.4	216		7.6	37	8.8	11.3	202
	8.5	30	8.5	10.9	245		9.1	38	8.4	10.7	230		8.1	45	8.1	10.6	216
	8.3	33	9.2	12.3	216		7.9	39	8.9	11.5	202		7.6	46	8.5	11.2	202
	6.6	15	11.3	15.6	259		5.8	22	10.8	14.5	274		6.4	16	11	14.8	230
	8.9	35	9.1	11.7	158		8.3	40	8.5	11.4	173		8.6	47	8.2	10.6	173
	11	18	12.8	17.1	288		10.5	19	11.5	16	274		11.6	13	11.7	15.4	288
	9.6	28	10.6	14.3	144		10.8	31	9.8	13.2	158		9.3	28	9.7	12.9	144
	7.2	17	10.2	13	173		6.5	21	9.9	12.5	187		6.8	34	9	11.7	187
	8.8	36	9.3	12.3	173		8.2	35	9.5	12.6	173		7.8	42	8.8	11.7	158
